# Supplementary material
Source: HighWire-hosted journal article supplement (https://bjgpopen.org/highwire/filestream/3643/field_highwire_adjunct_files/0/L_10.3399BJGPO.2020.0100_supp.pdf)
Supplement: L_10.3399BJGPO.2020.0100_supp.pdf [file L_10.3399BJGPO.2020.0100_supp.pdf]

Table S1. STROBE Statement—Checklist filled

|                              | <b>Item No</b> | <b>Recommendation</b>                                                                                                                                                                             | <b>Page No</b>                                       |
|------------------------------|----------------|---------------------------------------------------------------------------------------------------------------------------------------------------------------------------------------------------|------------------------------------------------------|
| <b>Title and abstract</b>    | 1              | (a) Indicate the study’s design with a commonly used term in the title or the abstract                                                                                                            | 1                                                    |
|                              |                | (b) Provide in the abstract an informative and balanced summary of what was done and what was found                                                                                               | 1-2                                                  |
| <b>Introduction</b>          |                |                                                                                                                                                                                                   |                                                      |
| Background/rationale         | 2              | Explain the scientific background and rationale for the investigation being reported                                                                                                              | 2-3                                                  |
| Objectives                   | 3              | State specific objectives, including any prespecified hypotheses                                                                                                                                  | 3                                                    |
| <b>Methods</b>               |                |                                                                                                                                                                                                   |                                                      |
| Study design                 | 4              | Present key elements of study design early in the paper                                                                                                                                           | 3-4                                                  |
| Setting                      | 5              | Describe the setting, locations, and relevant dates, including periods of recruitment, exposure, follow-up, and data collection                                                                   | 4                                                    |
| Participants                 | 6              | (a) Give the eligibility criteria, and the sources and methods of selection of participants                                                                                                       | 4                                                    |
| Variables                    | 7              | Clearly define all outcomes, exposures, predictors, potential confounders, and effect modifiers. Give diagnostic criteria, if applicable                                                          | 5                                                    |
| Data sources/<br>measurement | 8              | For each variable of interest, give sources of data and details of methods of assessment (measurement). Describe comparability of assessment methods if there is more than one group              | N/A                                                  |
| Bias                         | 9              | Describe any efforts to address potential sources of bias                                                                                                                                         | N/A                                                  |
| Study size                   | 10             | Explain how the study size was arrived at                                                                                                                                                         | 4                                                    |
| Quantitative variables       | 11             | Explain how quantitative variables were handled in the analyses. If applicable, describe which groupings were chosen and why                                                                      | N/A                                                  |
| Statistical methods          | 12             | (a) Describe all statistical methods, including those used to control for confounding                                                                                                             | 5                                                    |
|                              |                | (b) Describe any methods used to examine subgroups and interactions                                                                                                                               | 5                                                    |
|                              |                | (c) Explain how missing data were addressed                                                                                                                                                       | 5                                                    |
|                              |                | (d) If applicable, describe analytical methods taking account of sampling strategy                                                                                                                | N/A                                                  |
|                              |                | (e) Describe any sensitivity analyses                                                                                                                                                             | N/A                                                  |
| <b>Results</b>               |                |                                                                                                                                                                                                   |                                                      |
| Participants                 | 13             | (a) Report numbers of individuals at each stage of study—eg numbers potentially eligible, examined for eligibility, confirmed eligible, included in the study, completing follow-up, and analysed | Table 1 + Reference 14 about our recruitment results |
|                              |                | (b) Give reasons for non-participation at each stage                                                                                                                                              | Reference 14                                         |
|                              |                | (c) Consider use of a flow diagram                                                                                                                                                                | Reference 14                                         |
| Descriptive data             | 14             | (a) Give characteristics of study participants (eg demographic, clinical, social) and information on exposures and potential confounders                                                          | Table 1                                              |

|                          |    |                                                                                                                                                                                                              |                      |
|--------------------------|----|--------------------------------------------------------------------------------------------------------------------------------------------------------------------------------------------------------------|----------------------|
|                          |    | (b) Indicate number of participants with missing data for each variable of interest                                                                                                                          | Table 1              |
| Outcome data             | 15 | Report numbers of outcome events or summary measures                                                                                                                                                         | Tables 2 and 3       |
| Main results             | 16 | (a) Give unadjusted estimates and, if applicable, confounder-adjusted estimates and their precision (eg, 95% confidence interval). Make clear which confounders were adjusted for and why they were included | N/A                  |
|                          |    | (b) Report category boundaries when continuous variables were categorized                                                                                                                                    | N/A                  |
|                          |    | (c) If relevant, consider translating estimates of relative risk into absolute risk for a meaningful time period                                                                                             | N/A                  |
| Other analyses           | 17 | Report other analyses done—eg analyses of subgroups and interactions, and sensitivity analyses                                                                                                               | N/A                  |
| <b>Discussion</b>        |    |                                                                                                                                                                                                              |                      |
| Key results              | 18 | Summarise key results with reference to study objectives                                                                                                                                                     | 7                    |
| Limitations              | 19 | Discuss limitations of the study, taking into account sources of potential bias or imprecision. Discuss both direction and magnitude of any potential bias                                                   | 8-9                  |
| Interpretation           | 20 | Give a cautious overall interpretation of results considering objectives, limitations, multiplicity of analyses, results from similar studies, and other relevant evidence                                   | 11                   |
| Generalisability         | 21 | Discuss the generalisability (external validity) of the study results                                                                                                                                        | 10<br>'implications' |
| <b>Other information</b> |    |                                                                                                                                                                                                              |                      |
| Funding                  | 22 | Give the source of funding and the role of the funders for the present study and, if applicable, for the original study on which the present article is based                                                | 3 + 11               |

**Box S1. The baseline-questionnaire including the practice population registration tables**

1. Sex
  - Male
  - Female
2. How many years are you working in a GP practice?  
(one answer)
  - Less than 10 years
  - 10 to 20 years
  - 20 to 30 years
  - More than 30 years
3. Do you work full-time (GP practice-related work 5 days a week, on average 8 hours a day) or part-time (less than 5 days on 7)?
  - Full-time
  - Part-time
4. What are your extra activities?  
(more answers possible)
  - Medical director of nursing home
  - Palliative home care team supervisor
  - Research/education
  - GP circle representative
  - Institution for psychiatry, prison or handicap populations and so on
  - Other areas of expertise like sports medicine, occupational medicine or insurance medicine
5. In the past year, how many patients did you give palliative care?  
(one answer)
  - 0
  - 1-5
  - 6-10
  - More than 10
6. Which type of practice do you have?  
(one answer)
  - Single-handed
  - Duo-practice
  - Group-practice
  - Community health center
7. Does your practice have administrative support?  
(one answer)
  - Yes
  - No
8. Except administrative support, are there any other supporting disciplines in your practice?  
(one answer)
  - Yes
  - No
9. Which disciplines are present in your practice?      Free text
10. What is the payment system in your practice?
  - Fee for service
  - Capitation
11. Summary of practice population registration

1. General description of practice population, per age-sex category

|            | Male | Female | Total |
|------------|------|--------|-------|
| < 45 years |      |        |       |
| ≥ 45 years |      |        |       |
| Total      |      |        |       |

2. Description per location of contact of:

- Total number of patients
- Total number of patients eligible for the project

|                | Total number of patients | Age $\geq$ 45 years + life expectancy $<$ 1 year |
|----------------|--------------------------|--------------------------------------------------|
| Patient's home |                          |                                                  |
| Nursing home   |                          |                                                  |
| GP surgery     |                          |                                                  |



Table S3. Prevalence of candidates for early palliative care - calculations

| doctor | m_young | m_old | m_tot | f_young | f_old | f_tot | tot_young | tot_old | tot_tot1 | tot_home | tot_inst | tot_cons | cand_hom | cand_inst | cand_cons | sign_home | sign_inst | sign_cons |
|--------|---------|-------|-------|---------|-------|-------|-----------|---------|----------|----------|----------|----------|----------|-----------|-----------|-----------|-----------|-----------|
| 1      | 22      | 26    | 48    | 44      | 23    | 67    | 66        | 49      | 115      | 12       | 0        | 103      | 1        | 0         | 0         | 0         | 0         | 0         |
| 2      | 22      | 42    | 64    | 18      | 37    | 55    | 40        | 79      | 119      | 16       | 11       | 92       | 3        | 8         | 7         | 0         | 0         | 0         |
| 3      | 27      | 13    | 40    | 43      | 9     | 52    | 70        | 22      | 92       | 3        | 0        | 89       | 1        | 0         | 0         | 0         | 0         | 0         |
| 4      | 45      | 66    | 111   | 52      | 92    | 144   | 97        | 158     | 255      | 30       | 1        | 224      | 9        | 0         | 0         | 0         | 0         | 0         |
| 5      | 20      | 67    | 87    | 17      | 71    | 88    | 37        | 138     | 175      | 29       | 5        | 141      | 4        | 0         | 6         | 0         | 0         | 0         |
| 6      | 27      | 31    | 58    | 58      | 63    | 121   | 85        | 94      | 179      | 16       | 1        | 162      | 13       | 1         | 16        | 0         | 0         | 0         |
| 7      | 14      | 25    | 39    | 32      | 45    | 77    | 46        | 70      | 116      | 16       | 5        | 95       | 9        | 4         | 2         | 1         | 0         | 0         |
| 9      | 31      | 12    | 43    | 67      | 17    | 84    | 98        | 29      | 127      | 4        | 1        | 122      | 0        | 0         | 0         | 0         | 0         | 0         |
| 10     | 28      | 22    | 50    | 56      | 28    | 84    | 84        | 50      | 134      | 2        | 0        | 132      | 1        | 0         | 2         | 0         | 0         | 0         |
| 11     | 37      | 37    | 74    | 55      | 98    | 153   | 92        | 135     | 227      | 6        | 15       | 206      | 2        | 11        | 8         | 0         | 0         | 0         |
| 12     | 6       | 15    | 21    | 17      | 17    | 34    | 23        | 32      | 55       | 2        | 8        | 45       | 0        | 6         | 0         | 0         | 0         | 0         |
| 13     | 22      | 14    | 36    | 34      | 10    | 44    | 56        | 24      | 80       | 2        | 0        | 78       | 1        | 0         | 0         | 0         | 0         | 0         |
| 14     | 28      | 23    | 51    | 45      | 34    | 79    | 73        | 57      | 130      | 7        | 0        | 123      | 1        | 0         | 0         | 0         | 0         | 0         |
| 15     | 33      | 61    | 94    | 32      | 99    | 131   | 65        | 160     | 225      | 85       | 7        | 133      | 1        | 5         | 0         | 0         | 0         | 0         |
| 16     | 31      | 12    | 43    | 32      | 30    | 62    | 63        | 42      | 105      | 8        | 1        | 96       | 0        | 0         | 0         | 0         | 0         | 0         |
| 17     | 7       | 63    | 70    | 18      | 87    | 105   | 25        | 150     | 175      | 50       | 4        | 121      | 4        | 4         | 2         | 1         | 0         | 0         |
| 18     | 0       | 4     | 4     | 0       | 11    | 11    | 0         | 15      | 15       | 1        | 14       | 0        | 0        | 4         | 0         | 0         | 4         | 0         |
| 19     | 14      | 3     | 17    | 17      | 17    | 34    | 31        | 20      | 51       | 0        | 12       | 39       | 0        | 5         | 0         | 0         | 0         | 0         |
| 20     | 23      | 28    | 51    | 45      | 81    | 126   | 68        | 109     | 177      | 18       | 26       | 133      | 9        | 18        | 12        | 0         | 0         | 0         |
| 21     | 36      | 79    | 115   | 40      | 116   | 156   | 76        | 195     | 271      | 59       | 43       | 169      | 5        | 16        | 0         | 1         | 8         | 0         |
| 22     | 73      | 24    | 97    | 102     | 47    | 149   | 175       | 71      | 246      | 17       | 1        | 228      | 2        | 0         | 0         | 0         | 0         | 0         |
| 24     | 19      | 60    | 79    | 14      | 115   | 129   | 33        | 175     | 208      | 18       | 16       | 174      | 3        | 6         | 5         | 0         | 0         | 0         |
| 25     | 23      | 74    | 97    | 22      | 89    | 111   | 45        | 163     | 208      | 28       | 51       | 129      | 3        | 23        | 5         | 0         | 0         | 0         |
| 26     | 25      | 80    | 105   | 28      | 86    | 114   | 53        | 166     | 219      | 55       | 8        | 156      | 4        | 1         | 5         | 1         | 0         | 0         |
| 27     | 20      | 21    | 41    | 24      | 40    | 64    | 44        | 61      | 105      | 24       | 17       | 64       | 4        | 13        | 1         | 0         | 0         | 0         |
| 28     | 35      | 55    | 90    | 36      | 51    | 87    | 71        | 106     | 177      | 6        | 9        | 162      | 1        | 2         | 0         | 0         | 0         | 0         |
| 31     | 28      | 38    | 66    | 48      | 61    | 109   | 76        | 99      | 175      | 25       | 4        | 146      | 3        | 1         | 0         | 0         | 0         | 0         |
| 32     | 24      | 51    | 75    | 21      | 77    | 98    | 45        | 128     | 173      | 20       | 28       | 125      | 10       | 21        | 28        | 0         | 0         | 0         |
| 33     | 28      | 47    | 75    | 43      | 82    | 125   | 71        | 129     | 200      | 38       | 6        | 156      | 9        | 2         | 3         | 0         | 0         | 0         |
| 34     | 10      | 23    | 33    | 32      | 37    | 69    | 42        | 60      | 102      | 0        | 6        | 96       | 0        | 3         | 0         | 0         | 0         | 0         |
| 35     | 81      | 74    | 155   | 112     | 101   | 213   | 193       | 175     | 368      | 13       | 14       | 341      | 0        | 0         | 0         | 0         | 0         | 0         |
| 36     | 28      | 31    | 59    | 42      | 44    | 86    | 70        | 75      | 145      | 14       | 2        | 129      | 0        | 1         | 0         | 0         | 0         | 0         |
| 37     | 43      | 19    | 62    | 69      | 28    | 97    | 112       | 47      | 159      | 7        | 0        | 152      | 0        | 0         | 0         | 0         | 0         | 0         |
| 38     | 24      | 98    | 122   | 36      | 144   | 180   | 60        | 242     | 302      | 116      | 4        | 182      | 4        | 3         | 0         | 3         | 3         | 0         |
| 39     | 15      | 18    | 33    | 31      | 67    | 98    | 46        | 85      | 131      | 34       | 13       | 84       | 4        | 3         | 0         | 0         | 0         | 0         |
| 41     | 47      | 41    | 88    | 62      | 89    | 151   | 109       | 130     | 239      | 0        | 0        | 239      | 0        | 0         | 6         | 0         | 0         | 0         |
| 42     | 19      | 27    | 46    | 26      | 76    | 102   | 45        | 103     | 148      | 20       | 26       | 102      | 2        | 18        | 2         | 0         | 0         | 0         |
| 43     | 12      | 22    | 34    | 35      | 49    | 84    | 47        | 71      | 118      | 16       | 3        | 99       | 2        | 0         | 0         | 0         | 0         | 0         |
| 44     | 27      | 11    | 38    | 45      | 12    | 57    | 72        | 23      | 95       | 5        | 0        | 90       | 0        | 0         | 0         | 0         | 0         | 0         |
| 46     | 8       | 5     | 13    | 5       | 2     | 7     | 13        | 7       | 20       | 4        | 0        | 16       | 0        | 0         | 0         | 0         | 0         | 0         |
| 47     | 30      | 23    | 53    | 42      | 64    | 106   | 72        | 87      | 159      | 7        | 16       | 136      | 1        | 5         | 2         | 0         | 0         | 1         |
| 49     | 11      | 17    | 28    | 14      | 14    | 28    | 25        | 31      | 56       | 4        | 0        | 52       | 0        | 0         | 0         | 0         | 0         | 0         |
| 50     | 48      | 97    | 145   | 47      | 104   | 151   | 95        | 201     | 296      | 9        | 11       | 276      | 2        | 5         | 3         | 0         | 0         | 0         |
| 51     | 41      | 40    | 81    | 47      | 62    | 109   | 88        | 102     | 190      | 0        | 25       | 165      | 0        | 8         | 13        | 0         | 0         | 0         |
| 52     | 23      | 57    | 80    | 23      | 80    | 103   | 46        | 137     | 183      | 1        | 0        | 182      | 1        | 0         | 0         | 1         | 0         | 0         |
| 53     | 23      | 46    | 69    | 45      | 93    | 138   | 68        | 139     | 207      | 12       | 5        | 190      | 2        | 1         | 6         | 0         | 0         | 0         |
| 56     | 10      | 22    | 32    | 6       | 104   | 110   | 16        | 126     | 142      | 16       | 6        | 120      | 3        | 2         | 0         | 0         | 0         | 0         |
| 57     | 13      | 37    | 50    | 9       | 29    | 38    | 22        | 66      | 88       | 11       | 3        | 74       | 1        | 0         | 1         | 0         | 0         | 1         |
| 58     | 53      | 66    | 119   | 60      | 109   | 169   | 113       | 175     | 288      | 13       | 0        | 275      | 0        | 0         | 1         | 0         | 0         | 0         |
| 59     | 16      | 44    | 60    | 25      | 59    | 84    | 41        | 103     | 144      | 31       | 32       | 81       | 6        | 12        | 4         | 0         | 0         | 0         |
| 60     | 11      | 37    | 48    | 17      | 49    | 66    | 28        | 86      | 114      | 4        | 0        | 110      | 1        | 0         | 7         | 0         | 0         | 0         |
| 61     | 26      | 68    | 94    | 74      | 112   | 186   | 100       | 180     | 280      | 32       | 30       | 218      | 1        | 1         | 0         | 0         | 0         | 0         |
| 62     | 18      | 19    | 37    | 9       | 13    | 22    | 27        | 32      | 59       | 4        | 1        | 54       | 0        | 1         | 0         | 0         | 0         | 0         |
| 63     | 23      | 39    | 62    | 51      | 32    | 83    | 74        | 71      | 145      | 18       | 2        | 125      | 2        | 1         | 3         | 1         | 0         | 0         |
| 64     | 28      | 48    | 76    | 37      | 31    | 68    | 65        | 79      | 144      | 0        | 0        | 144      | 0        | 0         | 0         | 0         | 0         | 0         |
| 65     | 80      | 50    | 130   | 94      | 70    | 164   | 174       | 120     | 294      | 10       | 0        | 284      | 4        | 0         | 2         | 0         | 0         | 0         |
|        | 1516    | 2172  | 3688  | 2155    | 3307  | 5462  | 3671      | 5479    | 9150     | 998      | 493      | 7659     | 139      | 215       | 152       | 9         | 15        | 2         |
